# Supplementary material
Source: PubMed Central journal article supplement (PMC2890751)
Supplement: 1005256107_pnas.201005256SI.pdf [file 1005256107_pnas.201005256SI.pdf]

# Supporting Information

Carrington et al. 10.1073/pnas.1005256107

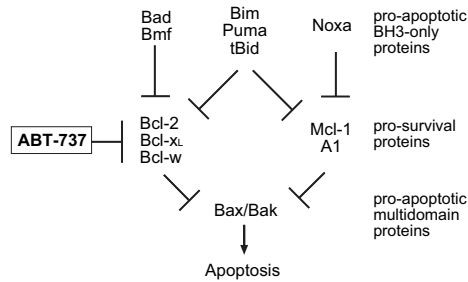

**Fig. S1.** Selective interactions between Bcl-2 family members, or their mimetics, regulate cytochrome-c-dependent apoptosis. Under steady-state conditions, prosurvival Bcl-2 family proteins Bcl-x<sub>L</sub>, Bcl-2, Bcl-w, Mcl-1, and A1 restrain proapoptotic multidomain proteins Bax and Bak and prevent the induction of apoptosis. After an apoptotic stimulus, proapoptotic BH3-only proteins are up-regulated and engage prosurvival proteins, allowing release of Bax and Bak and induction of apoptosis. Under physiological conditions, BH3-only proteins Bim, Puma, and tBid are potent death inducers as they can engage all known prosurvival proteins, whereas the remaining BH3-only proteins engage only select prosurvival proteins. For example, Bad and Bmf only interact with Bcl-2, Bcl-x<sub>L</sub>, and Bcl-w. Noxa can only engage A1 and Mcl-1. The BH3-only mimetic ABT-737 engages only Bcl-2, Bcl-x<sub>L</sub>, and Bcl-w and thus displays a similar specificity profile to Bad or Bmf.
